# Supplementary material for: Monitoring the two-dimensional concentration profile of toluene vapors by using polymer-stabilized nematic liquid crystals in microchannels
Source: Royal Society of Chemistry journal article supplement (doi:10.1039/c9lc01021a), 2020-01-01
Supplement: c9lc01021a1.pdf [file c9lc01021a1.pdf]

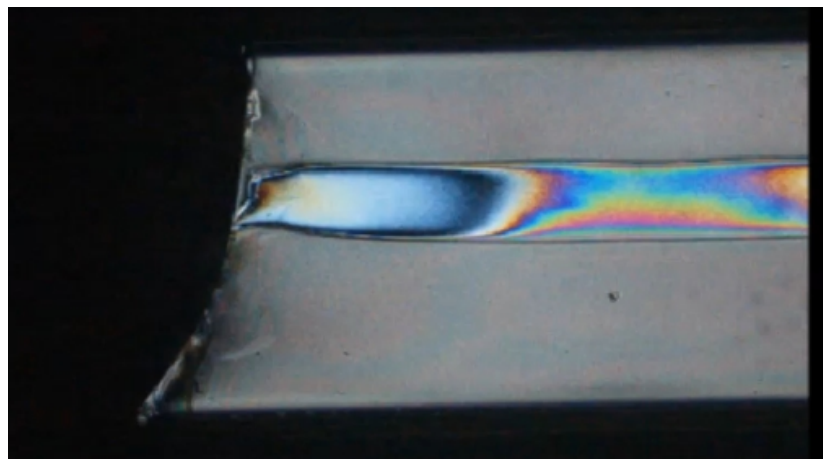

Movie 1: The diffusion of toluene into the microchannel.

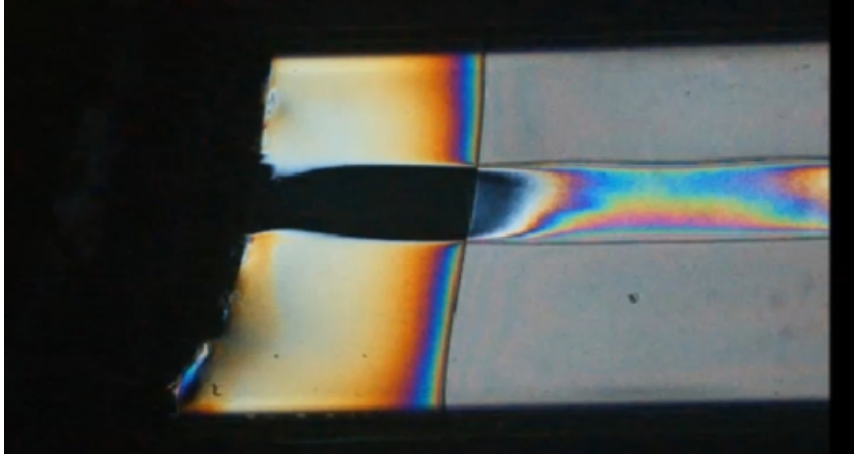

Movie 2: The diffusion of toluene out the microchannel.

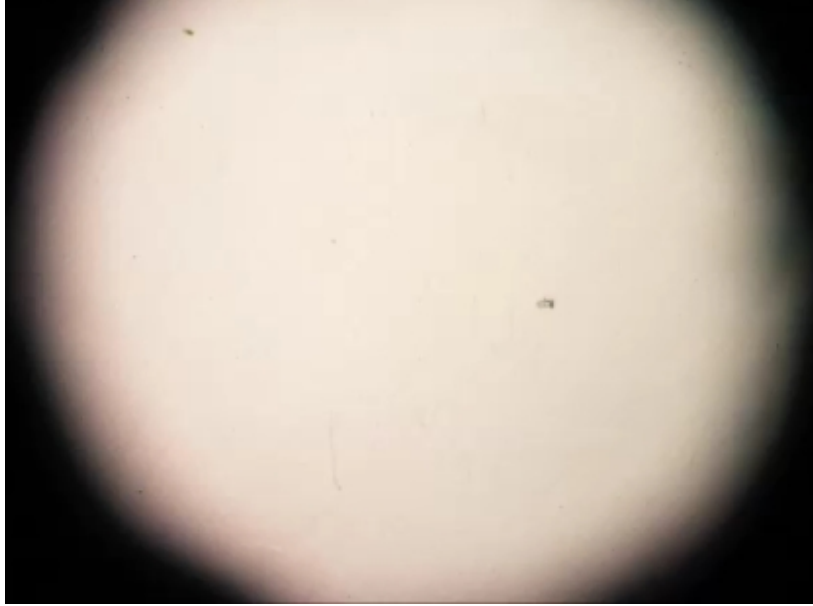

Movie 3: The sample heated from room temperature to 180 degree Celsius.
